# Supplementary material
Source: Springer Nature journal article supplement (https://www.springermedizin.de/resource/supplementary/12936_2012_2491_MOESM4_ESM.pdf/9542830)

Additional File 4. ESI mass spectra of RPHPLC purified peptides

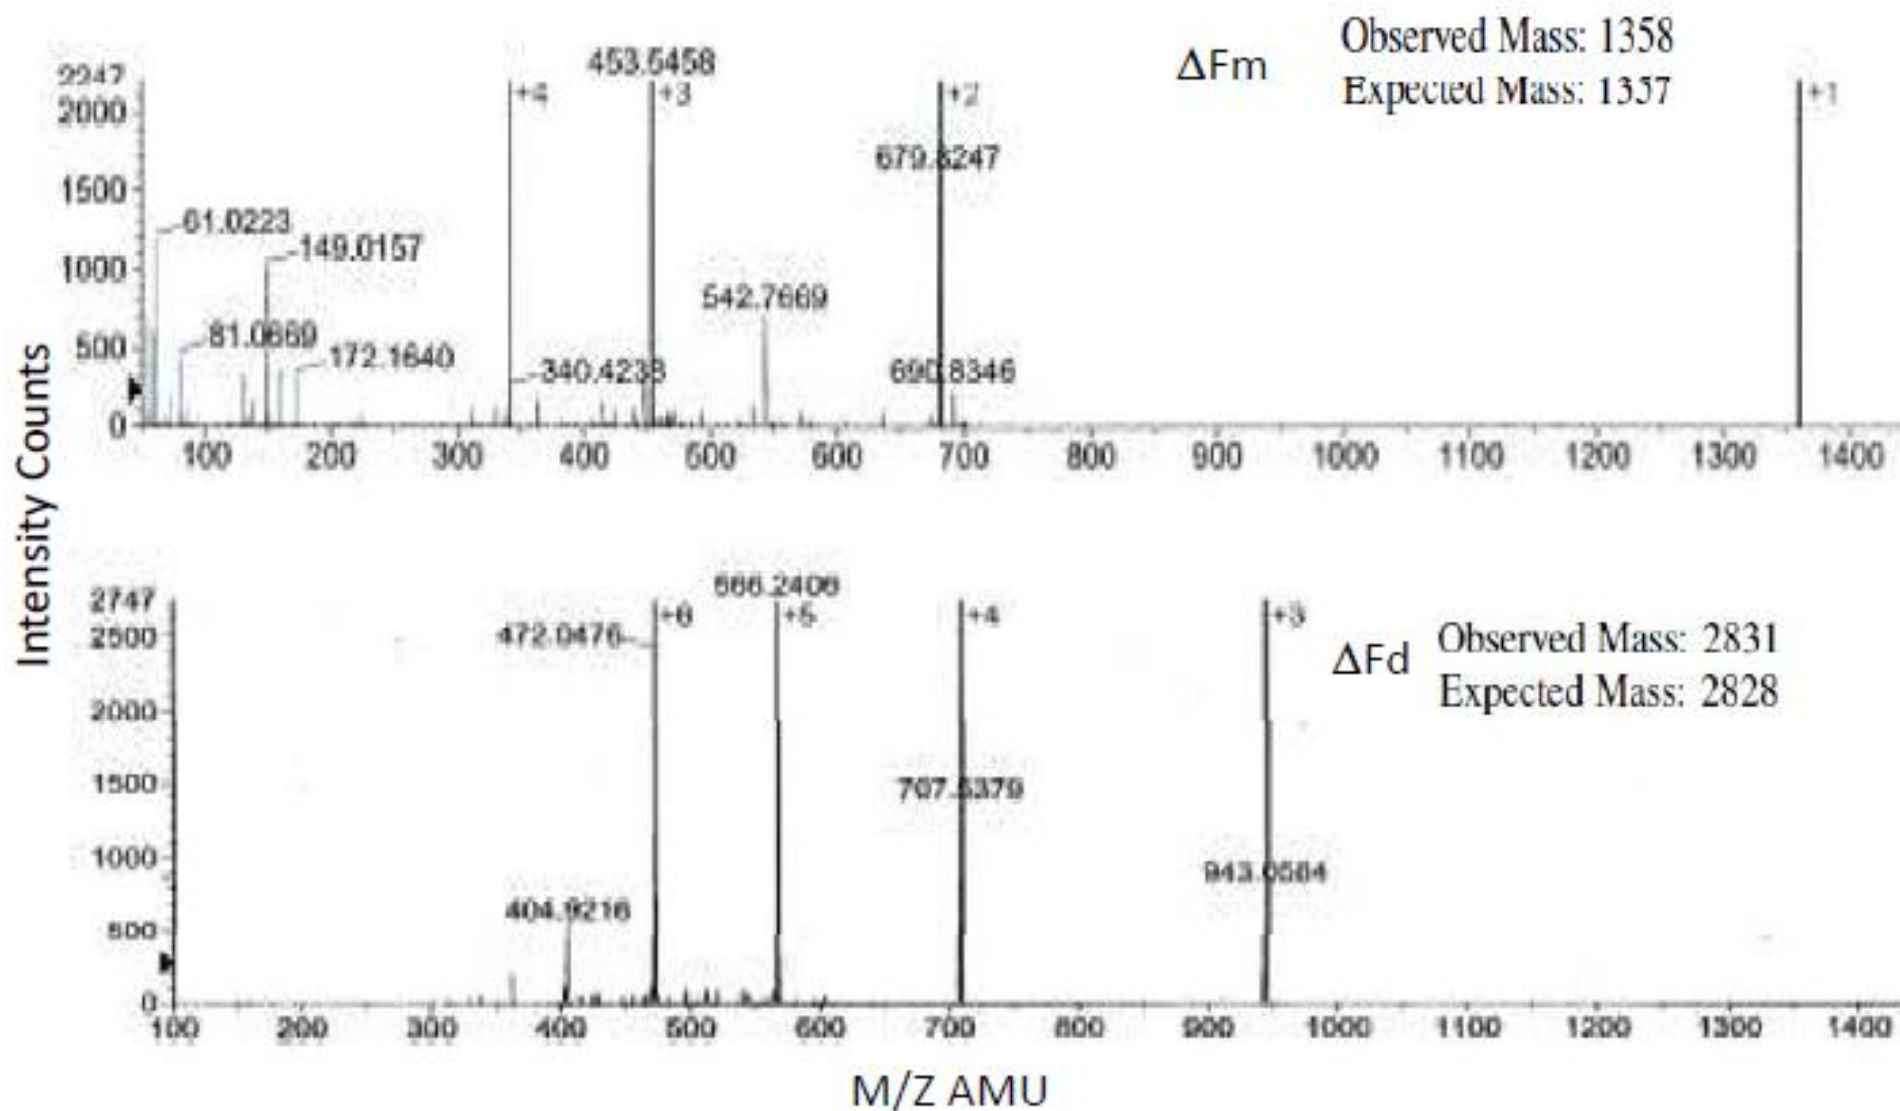

Supplement: MOESM4 [file 9542830]
